# Supplementary material
Source: MDPI journal article supplement (https://www.mdpi.com/search?q=molbank-2021-M1255)
Supplement: s002 [file molbank-2021-M1255-s002.inchi]

InChI=1/C43H65NO21.2C23H35NO11.C12H25NO6/c1-10-35(53)44(19-15-11-13-17-21-54-42-40(62-31(8)51)38(60-29(6)49)36(58-27(4)47)33(64-42)23-56-25(2)45)20-16-12-14-18-22-55-43-41(63-32(9)52)39(61-30(7)50)37(59-28(5)48)34(65-43)24-57-26(3)46;2*1-6-19(29)24-11-9-7-8-10-12-30-23-22(34-17(5)28)21(33-16(4)27)20(32-15(3)26)18(35-23)13-31-14(2)25;13-5-3-1-2-4-6-18-12-11(17)10(16)9(15)8(7-14)19-12/h10,33-34,36-43H,1,11-24H2,2-9H3;2*6,18,20-23H,1,7-13H2,2-5H3,(H,24,29);8-12,14-17H,1-7,13H2/t33?,34?,36-,37-,38+,39?,40?,41?,42+,43+;2*18?,20-,21+,22?,23+;8?,9-,10+,11?,12+/s2
AuxInfo=1/1/N:122,154,130,150,134,142,138,146,126,121,102,116,101,115,103,117,100,114,104,118,99,113,97,111,153,129,149,133,141,137,145,124,96,110,119,91,106,92,107,93,90,94,108,105,152,128,148,132,140,136,144,125,120,98,112,151,127,147,131,139,135,143,123,95,109;38,42,46,50,54,37,31,30,32,29,33,28,26,41,45,49,53,25,35,20,21,22,23,34,40,44,48,52,36,27,39,43,47,51,24;73,77,81,89,85,72,66,65,67,64,68,63,61,76,80,88,84,60,70,55,56,57,58,69,75,79,87,83,71,62,74,78,86,82,59;16,15,17,14,18,13,7,6,1,2,3,4,19,8,9,10,11,12,5/E:(2,3)(4,5)(6,7)(8,9)(11,12)(13,14)(15,16)(17,18)(19,20)(21,22)(23,24)(25,26)(27,28)(29,30)(31,32)(33,34)(36,37)(38,39)(40,41)(42,43)(45,46)(47,48)(49,50)(51,52)(54,55)(56,57)(58,59)(60,61)(62,63)(64,65);;;/rA:154CCCCOCCOOOOOCCCCCCNCCCCOCCOCCCCCCNCOCCOOCCOOCCOOCCOOCCCCCCOCCOCCCCCCNCOCCOOCCOOCCOOCCOOCCCCCCCOCCOCCCCCCNCCCOCCOCCCCCCCOCCOCOCOOCCOOCCOOCCOOCCOOCCOOCCOOCC/rB:P1;P2;p3;s4;s1s5;s6;s7;s1;s2;s3;s4;s12;s13;s14;s15;s16;s17;s18;;P20;P21;p22;s23;s20s24;s25;s23;s27;s28;s29;s30;s31;s32;s33;s34;d35;s35;d37;s26;;s39d40;s41;s20;;s43d44;s45;s21;;s47d48;s49;s22;;s51d52;s53;;P55;P56;p57;s58;s55s59;s60;s58;s62;s63;s64;s65;s66;s67;s68;s69;d70;s70;d72;s61;;s74d75;s76;s55;;s78d79;s80;s57;;s82d83;s84;s56;;s86d87;s88;;;P91;P92;p93;s94;s91s95;s96;s94;s98;s99;s100;s101;s102;s103;s104;;s90s106;s90;P108;P106P109;s110;s108;s112;s113;s114;s115;s116;s105s117;s105;d119;s119;d121;s90;s123;d124;s124;s111;;s127d128;s129;s106;;s131d132;s133;s107;;s135d136;s137;s92;;s139d140;s141;s93;;s143d144;s145;s91;;s147d148;s149;s97;;s151d152;s153;/rC:-24.7617,15.3946,0;-23.9916,14.0608,0;-22.5017,14.4511,0;-21.021,14.0608,0;-21.7908,15.3946,0;-23.2809,15.0043,0;-24.051,16.3381,0;-22.9619,17.4272,0;-26.2493,14.9959,0;-25.5317,14.0608,0;-22.5017,16.3521,0;-21.021,12.5207,0;-19.6871,11.7506,0;-18.3533,12.5207,0;-17.0197,11.7506,0;-15.6858,12.5207,0;-14.352,11.7506,0;-13.0184,12.5207,0;-11.6845,11.7506,0;-24.4223,2.5333,0;-23.6522,1.1994,0;-22.1625,1.5898,0;-20.6816,1.1994,0;-21.4517,2.5333,0;-22.9415,2.1431,0;-23.7116,3.4767,0;-20.6816,-.3407,0;-19.3479,-1.1107,0;-18.0141,-.3407,0;-16.6803,-1.1107,0;-15.3464,-.3407,0;-14.0128,-1.1107,0;-12.679,-.3407,0;-11.3451,-1.1107,0;-10.3264,-1.1107,0;-10.3264,.4294,0;-8.9928,-1.8808,0;-7.6589,-1.1107,0;-22.6225,4.5658,0;-20.7428,2.6861,0;-21.1401,4.1686,0;-20.0549,5.2538,0;-25.91,2.1345,0;-26.5981,4.7023,0;-26.9953,3.2199,0;-28.4777,2.8226,0;-25.1924,1.1994,0;-25.1924,3.8578,0;-25.9598,2.5286,0;-27.4945,2.5286,0;-22.1625,3.4907,0;-19.5042,3.4907,0;-20.8334,4.2582,0;-20.8334,5.7931,0;-23.2255,-11.473,0;-22.4554,-12.8068,0;-20.9655,-12.4165,0;-19.4846,-12.8068,0;-20.2547,-11.473,0;-21.7446,-11.8632,0;-22.5146,-10.5295,0;-19.4846,-14.347,0;-18.151,-15.117,0;-16.8171,-14.347,0;-15.4833,-15.117,0;-14.1496,-14.347,0;-12.8158,-15.117,0;-11.482,-14.347,0;-10.1481,-15.117,0;-10.1481,-16.6571,0;-11.482,-17.4272,0;-8.8145,-17.4272,0;-7.4807,-16.6571,0;-21.4257,-9.4404,0;-19.546,-11.3201,0;-19.9431,-9.8377,0;-18.8579,-8.7523,0;-24.7131,-11.8716,0;-25.4011,-9.304,0;-25.7983,-10.7864,0;-27.2808,-11.1837,0;-20.9655,-10.5153,0;-18.3072,-10.5153,0;-19.6364,-9.7481,0;-19.6364,-8.2132,0;-23.9955,-12.8068,0;-23.9955,-10.1485,0;-24.7628,-11.4777,0;-26.2977,-11.4777,0;22.8504,13.046,0;-1.0243,13.9895,0;-.2543,12.6556,0;1.2356,13.046,0;2.7164,12.6556,0;1.9465,13.9895,0;.4564,13.5993,0;-.3136,14.933,0;2.7164,11.1155,0;4.0502,10.3455,0;5.3841,11.1155,0;6.7177,10.3455,0;8.0515,11.1155,0;9.3854,10.3455,0;10.719,11.1155,0;12.0528,10.3455,0;25.1104,13.9895,0;24.3403,12.6556,0;21.3697,12.6556,0;22.1396,13.9895,0;23.6297,13.5993,0;24.3997,14.933,0;21.3697,11.1155,0;20.0359,10.3455,0;18.702,11.1155,0;17.3684,10.3455,0;16.0346,11.1155,0;14.7007,10.3455,0;13.3669,11.1155,0;12.0528,8.8053,0;10.719,8.0353,0;13.3867,8.0353,0;14.7203,8.8053,0;22.8504,14.9871,0;24.1796,15.7545,0;25.5088,14.9871,0;24.1796,17.2892,0;23.3106,16.022,0;25.1903,14.1424,0;24.793,15.6248,0;25.8784,16.71,0;26.5981,13.5907,0;25.91,11.0231,0;26.9953,12.1083,0;28.4777,11.711,0;25.8805,12.6556,0;25.8805,15.314,0;25.113,13.9848,0;23.5783,13.9848,0;-1.7944,12.6556,0;-1.7944,15.314,0;-2.5618,13.9848,0;-4.0965,13.9848,0;1.2356,14.947,0;3.894,14.947,0;2.5648,15.7144,0;2.5648,17.2491,0;-2.512,13.5907,0;-3.2001,16.1585,0;-3.5971,14.6761,0;-5.0798,14.2788,0;.7755,16.022,0;2.6552,14.1424,0;2.2579,15.6248,0;3.3431,16.71,0;
